# Supplementary material
Source: PubMed Central journal article supplement (PMC3114804)
Supplement: supp_124.5.789_JCS077230FigS2.pdf [file supp_124.5.789_JCS077230FigS2.pdf]

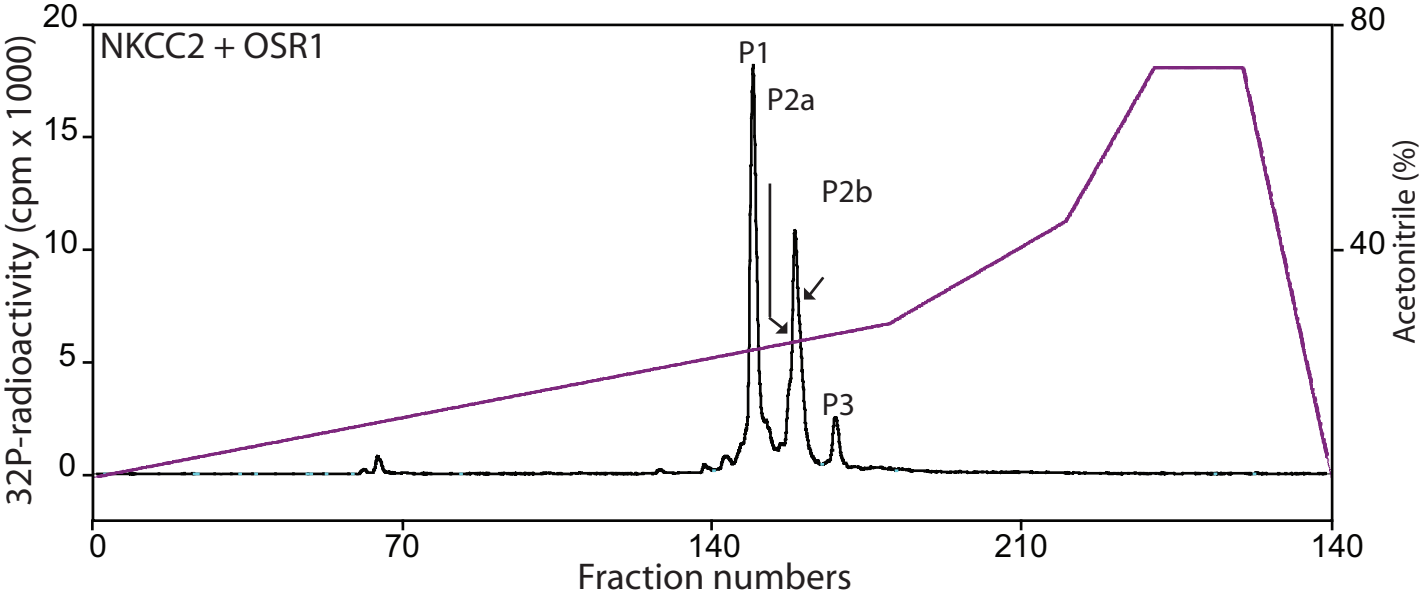

| Sample ID | Phosphopeptide                    | m/z (observed) | Cycle of <sup>32</sup> P release | Phosphorylation site |
|-----------|-----------------------------------|----------------|----------------------------------|----------------------|
| P1        | TDASFHAYDSHTNTYYLQ(p)TFGHNTmDAVPK | 3528.74        | 19                               | Thr100               |
| P2a       | TDASFHAYDSHTN(p)TYYLQTFGHNTmDAVPK | 3528.77        | 14                               | Thr95                |
| P2b       | TDASFHAYDSHTNTYYLQ(p)TFGHNTmDAVPK | 3528.75        | 19                               | Thr100               |
|           | TDASFHAYDSHTNTYYLQ(p)TFGHNTMDAVPK | 3512.77        | 19                               | Thr100               |
| P3        | TDASFHAYDSHTN(p)TYYLQTFGHNTMDAVPK | 3512.77        | 14                               | Thr95                |
