# Supplementary material
Source: PubMed Central journal article supplement (PMC3114804)

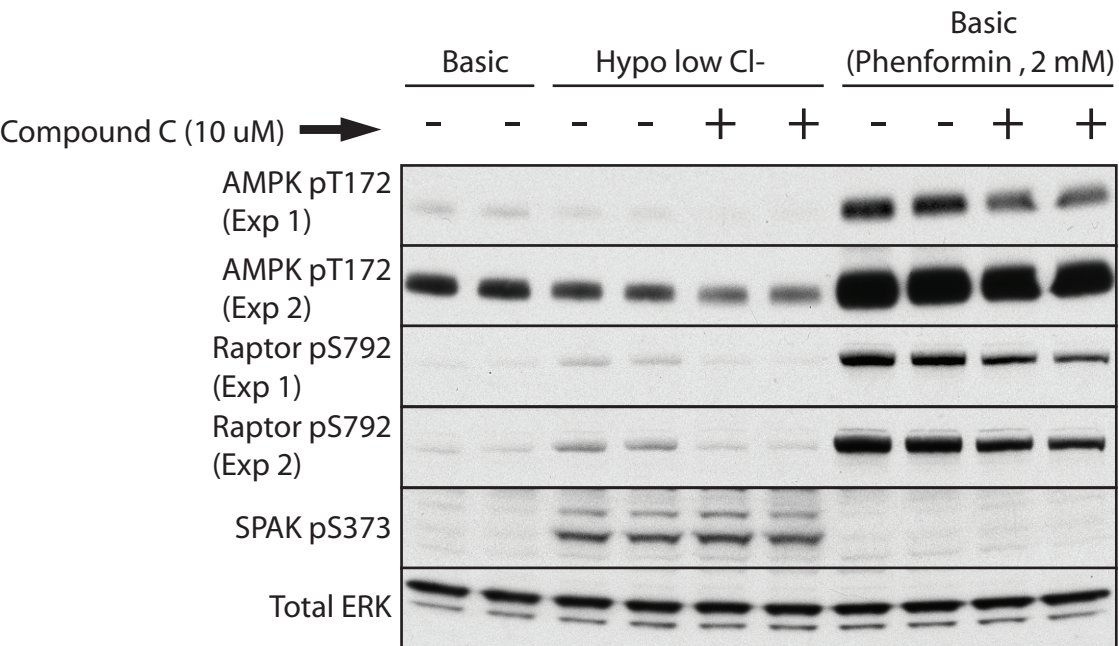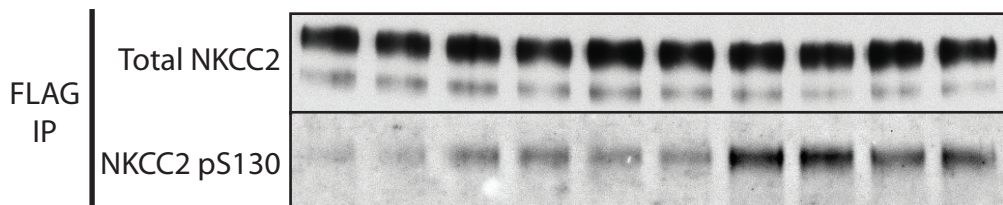

Supplement: supp_124.5.789_JCS077230FigS3.pdf [file supp_124.5.789_JCS077230FigS3.pdf]

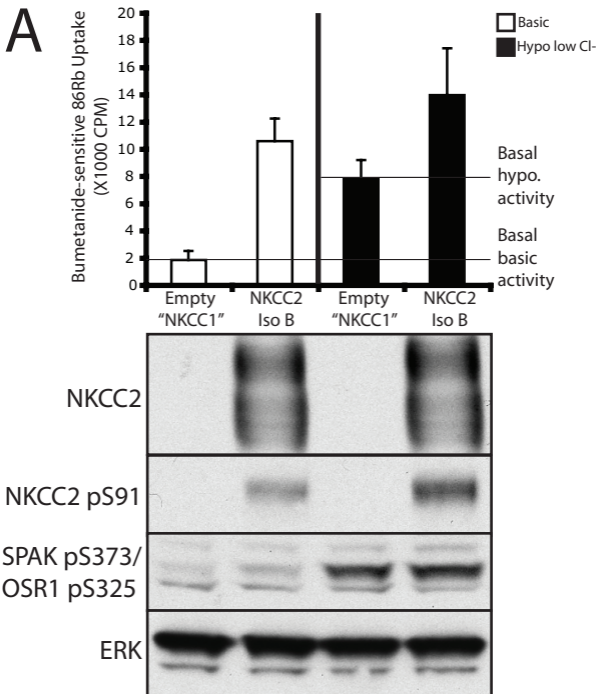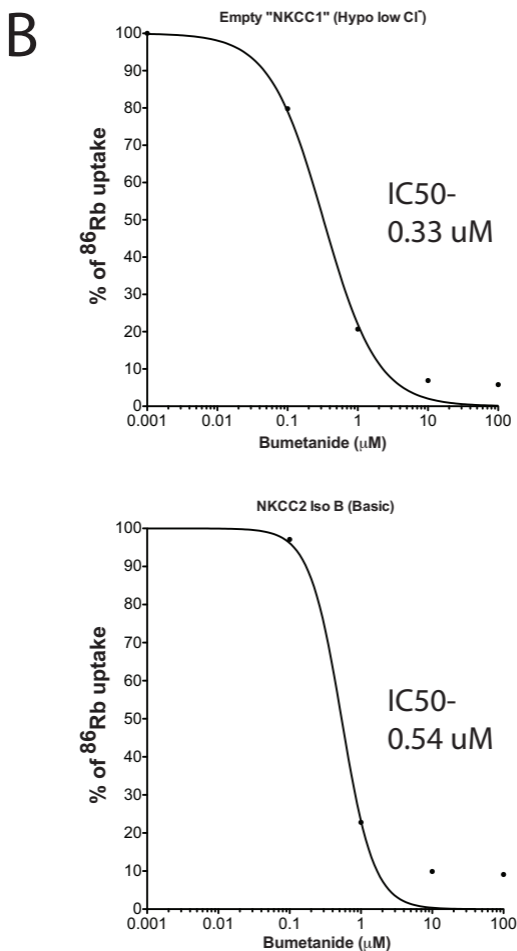

Supplement: supp_124.5.789_JCS077230FigS4.pdf [file supp_124.5.789_JCS077230FigS4.pdf]

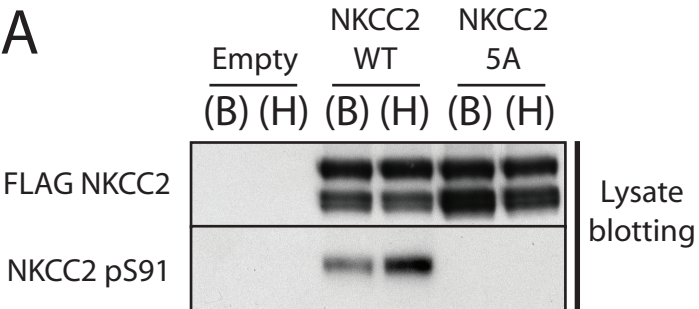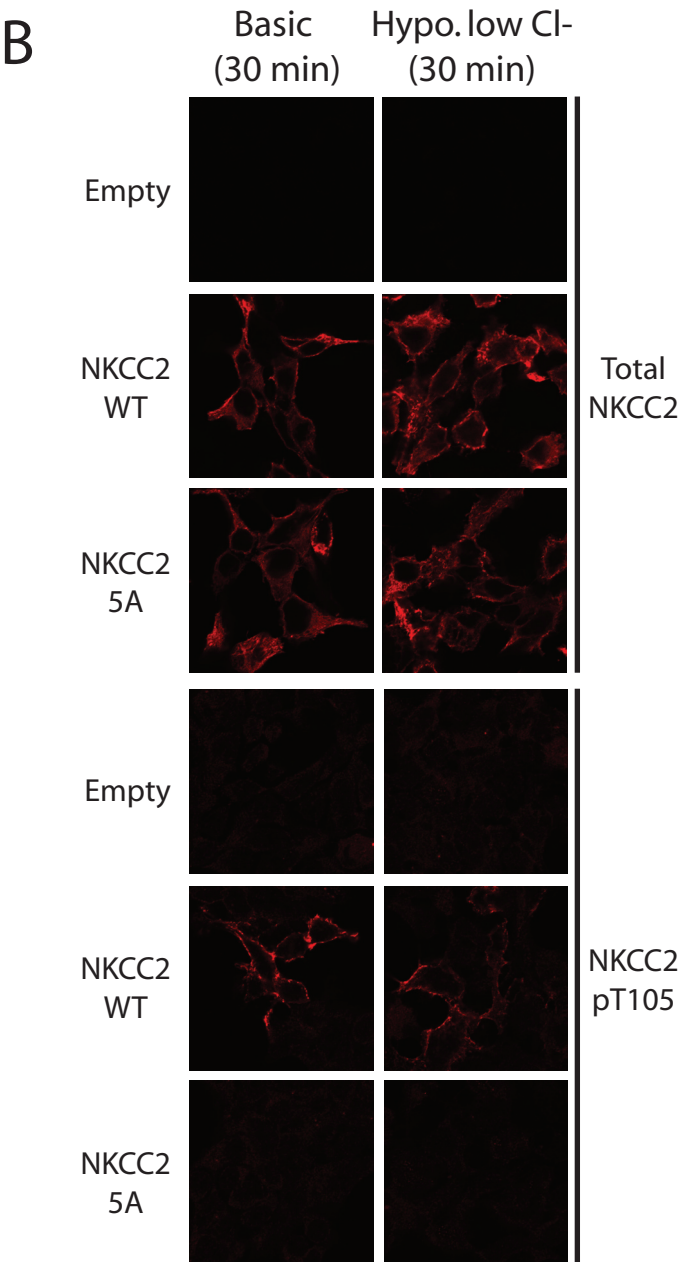

Supplement: supp_124.5.789_JCS077230FigS5.pdf [file supp_124.5.789_JCS077230FigS5.pdf]
